# Supplementary material for: Electrostatically controlled isolation of debundled single-walled carbon nanotubes from nanoplatelet dispersant
Source: Royal Society of Chemistry journal article supplement (doi:10.1039/c2jm15210j), 2012-01-01
Supplement: c2jm15210j.pdf [file c2jm15210j.pdf]

## Supporting Information

# Electrostatically controlled isolation of debundled single-walled carbon nanotubes from nanoplatelet dispersant

Xi Zhang,<sup>a</sup> Hung-Jue Sue\*<sup>a,b</sup> and Richi Nishimura<sup>c</sup>

<sup>a</sup> Department of Materials Science and Engineering, Texas A&M University, College Station, Texas 77843, US. E-mail: lifefantasy@gmail.com

<sup>b</sup> Department of Mechanical Engineering, Texas A&M University, College Station, Texas 77843, US. E-mail: hjsue@tamu.edu

<sup>c</sup> Corporate R&D Division, Kaneka Corporation, Osaka 530-8288, Japan. E-mail: Riichi\_Nishimura@kn.kaneka.co.jp

### Element maps

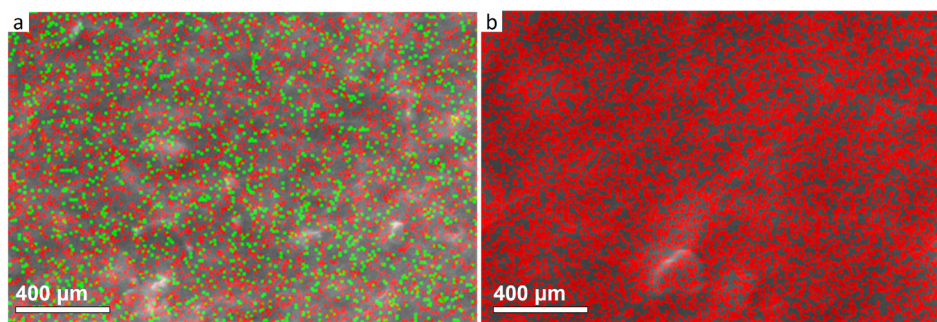

**Fig. S1** Element maps of (a) SWCNT/ZrP hybrid and (b) SWCNTs isolated from SWCNT/ZrP/TX-100 mixture. The mapping was performed on an area of 1.3 mm x 2 mm to obtain overall chemical composition of the samples. Green dots: phosphorus; red dots: carbon; and gray background: aluminum substrate.

## Quantification of concentration of well-dispersed SWCNT in aqueous solution

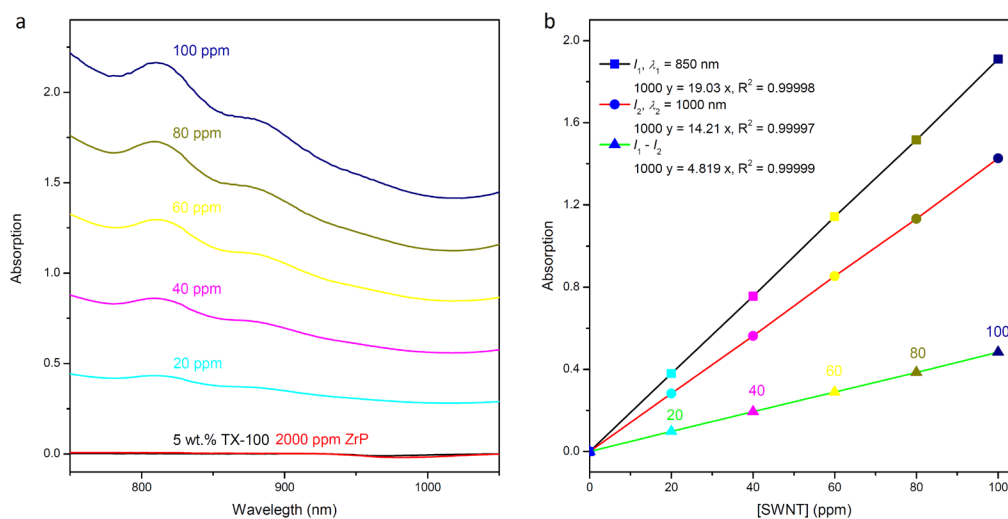

**Fig. S2** (a) UV-vis spectra of aqueous solutions of TX-100, ZrP exfoliated by  $\text{TBA}^+\text{OH}^-$ , and SWCNT/ZrP/TX-100 at various concentrations. (b) Linear fit of absorption intensity at different wavelengths versus [SWCNT].

According to Beer–Lambert law, at a fixed wavelength ( $\lambda$ ) of excitation light:

$$I = \epsilon lc$$

where  $I$  = absorption intensity,  $\epsilon$  = scaling constant,  $l$  = light path length, and  $c$  = solute concentration.

The equation describes the linear dependence of absorption intensity on solute concentration. Assuming that SWCNT remains well dispersed before and after ZrP removal and at  $l = 10$  mm, we have

$$I_1 = \epsilon_1 [\text{SWCNT}], \text{ at } \lambda_1$$

$$I_2 = \epsilon_2 [\text{SWCNT}], \text{ at } \lambda_2$$

$$I_1 - I_2 = (\epsilon_1 - \epsilon_2) [\text{SWCNT}] = \epsilon' [\text{SWCNT}], \epsilon' = \epsilon_1 - \epsilon_2$$

Here, the difference between the absorption intensity at two different wavelengths is used to compensate the zero line shift of the spectrometer. Absorption spectra of aqueous solutions of TX-100, ZrP dispersion, and SWCNT/ZrP/TX-100 mixture with [SWCNT] = 20, 40, 60, 80 and 100 ppm are shown in Figure S2a. The linear fit of absorption intensity at  $\lambda_1 = 850$  nm, denoted as  $I_1$ , absorption intensity at  $\lambda_2 = 1000$  nm, denoted as  $I_2$ , and their intensity difference, denoted as  $I_1 - I_2$ , to [SWCNT] is shown in Figure S2b. The above wavelengths were chosen because the ZrP

dispersant, TX-100 and the accompanied ion species exhibit zero absorption at those wavelengths. The linear fit of  $I_1$ ,  $I_2$  and  $I_1 - I_2$  as a function of [SWCNT] yield  $R^2 = 0.99998$ ,  $0.99997$ , and  $0.99999$ , respectively. Thus, this method is reliable for measuring [SWCNT].

After centrifugation, the SWCNT-enriched supernatant does not possess the same volume before salt addition because the precipitated ZrP contains trapped water. Therefore, pure water was added to the supernatant to reach a known volume. By comparing the [SWCNT] (after SWCNT-ZrP separation) multiplied by the volume of the diluted supernatant against [SWCNT] (before separation) multiplied by the volume of the SWCNT/ZrP/TX-100 dispersion, the yield of SWCNT in the supernatant can be quantified precisely.
